# Supplementary material for: Synthesis of amino acid derivatives of quinolone antibiotics
Source: Royal Society of Chemistry journal article supplement (doi:10.1039/b900762h), 2009-01-01

## Supporting Information

### Synthesis of amino acid derivatives of quinolone antibiotics

Alan Roy Katritzky,<sup>\*a</sup> Munawar Ali Munawar,<sup>a</sup> Judit Kovacs<sup>a</sup> and Levan Khelashvili<sup>a</sup>

<sup>a</sup>Center for Heterocyclic Compounds, Department of Chemistry,

University of Florida, Gainesville, FL 32611-7200, USA

E-mail: [katritzky@chem.ufl.edu](mailto:katritzky@chem.ufl.edu)

#### Table of Contents

|                                                                                                            |     |
|------------------------------------------------------------------------------------------------------------|-----|
| 1. General methods.....                                                                                    | S2  |
| 2. Preparation and Characterization of <b>6-8</b> .....                                                    | S2  |
| 3. Preparation and Characterization of Oxolinic-Amino Acid Conjugates <b>25-29,31-40</b> .....             | S4  |
| 4. Preparation and Characterization of Nalidixic-Amino Acid Conjugates <b>41-51</b> .....                  | S9  |
| 5. Preparation and Characterization of Cinoxacin-Amino Acid Conjugates <b>52-54</b> .....                  | S13 |
| 6. Preparation and Characterization of Flumequine-Amino Acid Conjugates <b>55-56</b> .....                 | S14 |
| 7. Representative <sup>1</sup> H and <sup>13</sup> C NMR spectras of compounds <b>28, 44, 53, 56</b> ..... | S16 |

**General methods.** Melting points were determined on a capillary point apparatus equipped with a digital thermometer and are uncorrected. NMR spectra were recorded in DMSO-*d*<sub>6</sub> or CDCl<sub>3</sub> with TMS for <sup>1</sup>H (300 MHz) and <sup>13</sup>C (75 MHz) as internal reference. HPLC analyses were performed using Chirobiotic T column (4.6 x 250 mm), detection at 220 nm, flow rate of 0.5 mL/min and MeOH/H<sub>2</sub>O (50:50) as an eluting solvent.

**3-(1*H*-Benzo[*d*][1,2,3]triazole-1-carbonyl)-1-ethyl-7-methyl-1,8-naphthyridin-4(1*H*)-one (6):**

To a solution of 1*H*-benzotriazole (2.0 g, 16 mmol) in methylene-chloride was added thionyl chloride (0.5 g, 4.5 mmol) at 25°C. After 30 min. 1-ethyl-7-methyl-4-oxo-1,4-dihydro-1,8-naphthyridine-3-carboxylic acid (1.0 g, 4.3 mmol) was added and the stirring was continued for 2h. The precipitate was filtered off, and the filtrate was washed with water and evaporated to give yellow solid of 3-(1*H*-benzo[*d*][1,2,3]triazole-1-carbonyl)-1-ethyl-7-methyl-1,8-naphthyridin-4(1*H*)-one (1.3 g, 4.1 mmol, 90%) with the melting point of 169-171°C.

<sup>1</sup>H NMR (300 MHz, CDCl<sub>3</sub>) δ: 1.54 (t, *J* = 7.2 Hz, 3H), 2.70 (s, 3H), 4.54 (q, *J* = 7.1 Hz, 2H), 7.28 (d, *J* = 8.1 Hz, 1H), 7.50 (t, *J* = 8.1 Hz, 1H), 7.66 (t, *J* = 7.4 Hz, 1H), 8.11 (d, *J* = 8.2 Hz, 1H), 8.32 (d, *J* = 8.2 Hz, 1H), 8.50 (s, 1H), 8.62 (d, *J* = 8.0 Hz, 1H). <sup>13</sup>C NMR (75 MHz, CDCl<sub>3</sub>) δ: 15.2, 25.1, 46.7, 114.4, 115.1, 120.0, 120.9, 121.3, 126.0, 130.0, 131.6, 136.8, 146.0, 147.5, 148.6, 163.1, 164.2, 174.5. C<sub>18</sub>H<sub>15</sub>N<sub>5</sub>O<sub>2</sub>·1/2 H<sub>2</sub>O, Calculated: C, 63.15; H, 4.71; N, 20.46, Found: C, 62.78; H, 4.61; N, 20.06.

**3-(1*H*-Benzo[*d*][1,2,3]triazole-1-carbonyl)-1-ethyl-[1,3]dioxolo[4,5-*g*]cinnolin-4(1*H*)-one (7):**

To a solution of 1*H*-benzotriazole (0.55 g, 4.60 mmol) in methylene-chloride was added thionyl-chloride (0.13 ml, 1.70 mmol) at 25°C. After 30 min. 1-ethyl-4-oxo-1,4-dihydro-[1,3]dioxolo[4,5-*g*]cinnoline-3-carboxylic acid (0.3 g, 1.15 mmol) was added and stirring was continued for 2h. The reaction mixture was washed with water (1x), aq. sat. sodium-carbonate (3x),

and brine (1x), dried over sodium sulfate and the solvent was removed under reduced pressure, gave 3-(1*H*-benzo[*d*][1,2,3]triazole-1-carbonyl)-1-ethyl-[1,3]dioxolo[4,5-*g*]cinnolin-4(1*H*)-one (0.3 g, 80%) with the melting point of 221-223°C.

<sup>1</sup>H NMR (300 MHz, DMSO-*d*<sub>6</sub>) δ: 1.42 (t, *J* = 7.0 Hz, 3H), 4.59 (q, *J* = 7 Hz, 2H), 6.33 (s, 2H), 7.48 (s, 1H), 7.69 (t, *J* = 7.7 Hz, 2H), 7.87 (t, *J* = 7.7 Hz, 1H), 8.31 (dd, *J* = 2.5 & 8.0 Hz, 2H). <sup>13</sup>C NMR (75 MHz, DMSO-*d*<sub>6</sub>) δ: 13.8, 18.0, 47.8, 52.7, 95.7, 100.8, 103.4, 123.2, 135.1, 138.1, 148.1, 154.0, 161.2, 167.7, 173.9. C<sub>18</sub>H<sub>13</sub>N<sub>5</sub>O<sub>4</sub>·1/2 H<sub>2</sub>O, Calculated: C, 58.06; H, 3.79; N, 18.81. Found: C, 58.06; H, 3.39; N, 18.71.

**2-(1*H*-Benzo[*d*][1,2,3]triazole-1-carbonyl)-9-fluoro-5-methyl-6,7-dihydropyrido[3,2-*l*-*ij*]quinolin-1(5*H*)-one (8):**

To a solution of 1*H*-benzotriazole (0.5 g, 4.4 mmol) in methylene-chloride was added thionyl chloride (0.2 g, 1.3 mmol) at 25°C. After 30 min. 9-fluoro-5-methyl-1-oxo-1,5,6,7-tetrahydropyrido[3,2-*l*-*ij*]quinoline-2-carboxylic acid (0.3 g, 1.1 mmol) was added and the stirring was continued for 2h. The precipitate was filtered off, and the filtrate was washed with water and evaporated to give yellow solid of 2-(1*H*-benzo[*d*][1,2,3]triazole-1-carbonyl)-9-fluoro-5-methyl-6,7-dihydropyrido[3,2-*l*-*ij*]quinolin-1(5*H*)-one (0.3 g, 0.83 mmol, 90%) with the melting point of 232-235°C.

<sup>1</sup>H NMR (300 MHz, DMSO-*d*<sub>6</sub>) δ: 1.43 (d, *J* = 6.7 Hz, 3H), 2.08-2.29 (m, 2H), 3.03-3.25 (m, 2H), 4.73 (bs, 1H), 7.58-7.68 (m, 2H), 7.69-7.89 (m, 2H), 8.20-8.34 (m, 2H), 8.77-8.88 (m, 1H). <sup>13</sup>C NMR (75 MHz, DMSO-*d*<sub>6</sub>) δ: 19.9, 21.5, 25.3, 56.5, 108.3, 108.6, 112.6, 113.6, 119.9, 120.4, 120.7, 126.3, 129.1, 129.2, 130.5, 130.9, 131.4, 131.5, 132.5, 145.4, 147.0, 160.4, 164.6, 172.3. C<sub>20</sub>H<sub>15</sub>FN<sub>4</sub>O<sub>2</sub>, Calculated: C, 66.29; H, 4.17; N, 15.46, Found: C, 66.19; H, 4.18; N, 15.14.

**General procedure for oxolinic-amino acid conjugates (25-40):**

A mixture of 7-(1*H*-benzo[*d*][1,2,3]triazole-1-carbonyl)-5-ethyl-[1,3]dioxolo[4,5-*g*]quinolin-8(5*H*)-one (181 mg, 0.5 mmol), amino acid (0.5 mmol) and triethylamine (101 mg, 0.13 mL, 1.0 mmol) in acetonitrile-water mixture (3.5 mL +1.5 mL) was stirred at room temperature for three hours. The acetonitrile was removed under vacuum and the residue was acidified with concentrated HCl. The precipitates was filtered and washed with cold water and dried under reduced pressure and recrystallized from aq. ethanol to gave the corresponding product.

**2-(5-Ethyl-8-oxo-dihydro-[1,3]dioxolo[4,5-*g*]quinoline-7-carboxamido)acetate (25):**

117 mg, 92%, mp. 296-298°C. <sup>1</sup>H NMR (300 MHz, DMSO-*d*<sub>6</sub>) δ: 1.35 (t, *J* = 7.0 Hz, 3H), 4.06 (bs, 2H), 4.41-4.43 (m, 2H), 6.22 (s, 2H), 7.45 (s, 1H), 7.61 (s, 1H), 8.68 (s, 1H), 10.57 (d, *J* = 4.8 Hz, 1H). <sup>13</sup>C NMR (75 MHz, DMSO-*d*<sub>6</sub>) δ: 14.6, 40.9, 48.9, 96.7, 102.6, 102.8, 110.2, 123.1, 136.1, 146.1, 146.3, 152.6, 164.6, 171.5, 174.0. C<sub>15</sub>H<sub>14</sub>N<sub>2</sub>O<sub>6</sub>, Calculated: C, 56.60; H, 4.43; N, 8.80, Found: C, 56.35; H, 4.41; N, 8.56.

**(*S*)-2-(5-Ethyl-8-oxo-dihydro-[1,3]dioxolo[4,5-*g*]quinoline-7-carboxamido)propanoate (26):**

160 mg, 96%, mp. 257-259 °C. <sup>1</sup>H NMR (300 MHz, DMSO-*d*<sub>6</sub>) δ: 1.32-1.41 (m, 6H), 4.13-4.52 (m, 3H), 6.23 (s, 2H), 7.47 (s, 1H), 7.60 (s, 1H), 8.69 (s, 1H), 10.48 (d, *J* = 7.0 Hz, 1H). <sup>13</sup>C NMR (75 MHz, DMSO-*d*<sub>6</sub>) δ: 14.6, 18.2, 47.5, 48.8, 96.6, 102.5, 102.7, 110.1, 123.1, 136.0, 146.0, 146.2, 152.5, 163.8, 174.1. C<sub>16</sub>H<sub>16</sub>N<sub>2</sub>O<sub>6</sub>, Calculated: C, 57.83; H, 4.85; N, 8.43, Found: C, 58.13; H, 4.84; N, 8.35.

**2-(5-Ethyl-8-oxo-dihydro-[1,3]dioxolo[4,5-*g*]quinoline-7-carboxamido)propanoic acid (27):**

140 mg, 84%, mp. 257-259 °C. <sup>1</sup>H NMR (300 MHz, DMSO-*d*<sub>6</sub>) δ: 1.32-1.41 (m, 6H), 4.41-4.50 (m, 3H), 6.23 (s, 2H), 7.47 (s, 1H), 7.60 (s, 1H), 8.69 (s, 1H), 10.48 (d, *J* = 7.2 Hz, 1H). <sup>13</sup>C NMR (75 MHz, DMSO-*d*<sub>6</sub>) δ: 14.6, 18.3, 47.5, 48.8, 96.6, 102.5, 102.7, 110.1, 123.1, 136.0, 146.0, 146.2, 152.5,

163.8, 174.0, 174.1. C<sub>16</sub>H<sub>16</sub>N<sub>2</sub>O<sub>6</sub>, Calculated: C, 57.83; H, 4.85; N, 8.43, Found: C, 57.53; H, 4.92; N, 8.46.

**(S)-2-(5-Ethyl-8-oxo-5,8-dihydro-[1,3]dioxolo[4,5-g]quinoline-7-carboxamido)-3-phenylpropanoate (28):**

280 mg, 58%, mp. 213-215°C. <sup>1</sup>H NMR (300 MHz, DMSO-d<sub>6</sub>) δ: 1.33 (t, *J* = 7.0 Hz, 3H), 3.00-3.08 (m, 1H), 3.15-3.22 (m, 1H), 4.40 (q, *J* = 6.0 Hz, 2H), 4.75 (q, *J* = 7.1 Hz, 1H), 6.23 (s, 2H), 7.19-7.30 (m, 5H), 7.46 (s, 1H), 7.60 (s, 1H), 8.67 (s, 1H), 10.49 (d, *J* = 7.6 Hz, 1H). <sup>13</sup>C NMR (75 MHz, DMSO-d<sub>6</sub>) δ: 14.6, 37.4, 48.8, 53.3, 96.6, 102.5, 102.7, 110.0, 123.0, 126.6, 128.3, 129.2, 136.0, 137.1, 146.1, 146.2, 152.5, 164.1, 172.8, 173.9. C<sub>22</sub>H<sub>20</sub>N<sub>2</sub>O<sub>6</sub>, Calculated: C, 64.70; H, 4.94; N, 6.86, Found: C, 64.34; H, 4.90; N, 6.85.

**2-(5-Ethyl-8-oxo-dihydro-[1,3]dioxolo[4,5-g]quinoline-7-carboxamido)-3-phenylpropanoate (29):**

180 mg, 88%, mp. 248-249 °C. <sup>1</sup>H NMR (300 MHz, DMSO-d<sub>6</sub>) δ: 1.33 (t, *J* = 7.0 Hz, 3H), 3.04 (dd, *J* = 13.5 & 8.0 Hz 1H), 3.18 (dd, *J* = 13.5 & 8.0 Hz 1H), 4.41 (q, *J* = 7.0 Hz, 2H), 4.75-4.77 (m, 1H), 6.23 (s, 2H), 7.22-7.30 (m, 5H), 7.47 (s, 1H), 7.61 (s, 1H), 8.67 (s, 1H), 10.49 (d, *J* = 7.8 Hz, 1H). <sup>13</sup>C NMR (75 MHz, DMSO-d<sub>6</sub>) δ: 14.5, 37.4, 48.8, 53.3, 96.6, 102.5, 102.7, 110.0, 123.0, 126.6, 128.2, 129.2, 136.0, 137.1, 146.1, 146.2, 152.5, 164.1, 172.8, 174.0. C<sub>22</sub>H<sub>20</sub>N<sub>2</sub>O<sub>6</sub>, Calculated: C, 64.70; H, 4.94; N, 6.86, Found: C, 64.34; H, 4.90; N, 6.85.

**(S)-2-(5-Ethyl-8-oxo-dihydro-[1,3]dioxolo[4,5-g]quinoline-7-carboxamido)-4-methylpentanoate (31):**

165 mg, 88%, mp. 219-221°C. <sup>1</sup>H NMR (300 MHz, DMSO-d<sub>6</sub>) δ: 0.92 (t, *J* = 6.9 Hz, 6H), 1.34 (t, *J* = 6.9 Hz, 3H), 1.62-1.75 (m, 3H), 4.42 (q, *J* = 6.9 Hz, 2H), 4.52 (q, *J* = 6.9 Hz, 1H), 6.23 (s, 2H), 7.47 (s, 1H), 7.61 (s, 1H), 8.70 (s, 1H), 10.46 (d, *J* = 7.8 Hz, 1H). <sup>13</sup>C NMR (75 MHz, DMSO-d<sub>6</sub>) δ: 14.6,

21.6, 22.9, 24.6, 41.0, 48.9, 50.2, 96.6, 102.5, 102.8, 110.1, 123.1, 136.0, 146.1, 146.2, 152.6, 164.2, 174.1. C<sub>19</sub>H<sub>22</sub>N<sub>2</sub>O<sub>6</sub>, Calculated: C, 60.95; H, 5.92; N, 7.48, Found: C, 60.67; H, 5.86; N, 7.14.

**(2*S*,3*S*)-2-(5-Ethyl-8-oxo-dihydro-[1,3]dioxolo[4,5-*g*]quinoline-7-carboxamido)-3-methylpentanoate (32):**

173 mg, 92%, mp. 225-228°C. <sup>1</sup>H NMR (300 MHz, DMSO-*d*<sub>6</sub>) δ: 0.88-0.93 (m, 6H), 1.17-1.28 (m, 1H), 1.34 (t, *J* = 7.0 Hz, 3H), 1.44-1.53 (m, 1H), 1.92 (m, 1H), 4.40-4.51 (m, 3H), 6.24 (s, 2H), 7.50 (s, 1H), 7.65 (s, 1H), 8.71 (s, 1H), 10.56 (d, *J* = 8.4 Hz, 1H). <sup>13</sup>C NMR (75 MHz, DMSO-*d*<sub>6</sub>) δ: 11.5, 14.6, 15.9, 24.7, 36.9, 48.9, 56.1, 96.6, 102.6, 102.7, 110.2, 123.1, 136.1, 146.1, 146.2, 152.6, 164.2, 173.0, 174.2. C<sub>19</sub>H<sub>22</sub>N<sub>2</sub>O<sub>6</sub>, Calculated: C, 60.95, H, 5.92; N, 7.48, Found: C, 60.61; H, 5.95; N, 7.32 .

**(*S*)-2-(5-Ethyl-8-oxo-dihydro-[1,3]dioxolo[4,5-*g*]quinoline-7-carboxamido)-3-(1*H*-indol-3-yl)propanoate (33):**

162 mg, 72%, mp. 167-171 °C. <sup>1</sup>H NMR (300 MHz, DMSO-*d*<sub>6</sub>) δ: 1.32 (t, *J* = 7.5 Hz, 3H), 3.17-3.33 (m, 2H), 4.40 (q, *J* = 7.5 Hz, 2H), 4.79-4.83 (m, 1H), 6.23 (s, 2H), 6.92-6.97 (m, 1H), 7.02-7.07 (m, 1H), 7.18 (s, 1H), 7.31-7.34 (m, 1H), 7.46 (s, 1H), 7.54-7.61 (m, 2H), 8.69 (s, 1H), 10.53 (d, *J* = 7.5 Hz, 1H), 10.91 (s, 1H). <sup>13</sup>C NMR (75 MHz, DMSO-*d*<sub>6</sub>) δ: 14.6, 27.7, 48.9, 52.7, 96.6, 102.5, 102.7, 109.4, 110.2, 111.4, 118.4, 121.0, 123.1, 123.6, 127.3, 136.0, 136.1, 146.1, 146.2, 152.5, 164.1, 173.3, 174.0. C<sub>24</sub>H<sub>21</sub>N<sub>3</sub>O<sub>6</sub> · H<sub>2</sub>O, Calculated: C, 61.93; H, 4.55; N, 9.03, Found: C, 61.71; H, 4.79; N, 9.35.

**(*S*)-2-(5-Ethyl-8-oxo-dihydro-[1,3]dioxolo[4,5-*g*]quinoline-7-carboxamido)-3-hydroxypropanoate (34):**

110 mg, 63%, mp. 246-248°C. <sup>1</sup>H NMR (300 MHz, DMSO-*d*<sub>6</sub>) δ: 1.34 (t, *J* = 7.5 Hz, 3H), 3.79-3.80 (m, 2H), 4.03-4.04 (m, 2H), 4.41 (q, *J* = 7.5 Hz, 2H), 6.23 (s, 2H), 7.47 (s, 1H), 7.60 (s, 1H), 8.33 (bs, 1H), 8.69 (s, 1H), 10.37 (s, 1H). <sup>13</sup>C NMR (75 MHz, DMSO-*d*<sub>6</sub>) δ: 14.6, 42.0, 45.4, 48.9, 96.6, 102.5,

102.8, 110.4, 123.1, 136.0, 146.0, 146.2, 152.5, 164.5, 171.2, 173.9. C<sub>16</sub>H<sub>16</sub>N<sub>2</sub>O<sub>7</sub>, Calculated: C, 55.17; H, 4.63; N, 8.04, Found: C, 55.00; H, 4.57; N, 7.68.

**(S)-2-(5-Ethyl-8-oxo-dihydro-[1,3]dioxolo[4,5-g]quinoline-7-carboxamido)-3-sulfanylpropanoate (35):**

160 mg, 88%, mp. 218-220 °C. <sup>1</sup>H NMR (300 MHz, DMSO-d<sub>6</sub>) δ: 1.38 (t, *J* = 7.2 Hz, 3H), 2.30 (t, *J* = 8.4 Hz, 1H), 3.02-3.06 (m, 2H), 4.48 (q, *J* = 7.5 Hz, 2H), 4.82-4.84 (m, 1H), 6.28 (s, 2H), 7.53 (s, 1H), 7.67 (s, 1H), 8.75 (s, 1H), 10.76 (d, *J* = 7.4 Hz, 1H). <sup>13</sup>C NMR (75 MHz, DMSO-d<sub>6</sub>) δ: 14.6, 26.2, 48.9, 53.6, 96.7, 102.6, 102.8, 107.1, 110.1, 123.1, 136.0, 146.2, 148.2, 152.6, 164.2, 171.5, 174.0. C<sub>16</sub>H<sub>16</sub>N<sub>2</sub>O<sub>6</sub>S·½H<sub>2</sub>O, Calculated: C, 51.47; H, 4.59; N, 7.50, Found: C, 51.07; H, 4.54; N, 7.19 .

**(S)-2-(5-Ethyl-8-oxo-dihydro-[1,3]dioxolo[4,5-g]quinoline-7-carboxamido)succinoate (36):**

180 mg, 96%, mp. 238-239°C. <sup>1</sup>H NMR (300 MHz, DMSO-d<sub>6</sub>) δ: 1.36 (t, *J* = 7.2 Hz, 3H), 2.73-2.89 (m, 2H), 4.43 (q, *J* = 7.2 Hz, 2H), 4.81 (m, 1H), 6.23 (s, 2H), 7.46 (s, 1H), 7.61 (s, 1H), 8.69 (s, 1H), 10.62 (d, *J* = 7.8 Hz, 1H). <sup>13</sup>C NMR (75 MHz, DMSO-d<sub>6</sub>) δ: 14.6, 36.6, 48.2, 48.9, 96.6, 102.5, 102.7, 110.1, 123.1, 136.0, 146.2, 152.5, 164.1, 171.9, 172.4, 173.9. C<sub>17</sub>H<sub>16</sub>N<sub>2</sub>O<sub>8</sub>, Calculated: C, 54.26; H, 4.29; N, 7.44, Found: C, 53.91; H, 4.29; N, 7.13 .

**(S)-2-(5-Ethyl-8-oxo-dihydro-[1,3]dioxolo[4,5-g]quinoline-7-carboxamido)-3-methylbutanoate (37):**

130 mg, 72%, mp. 225-227°C. <sup>1</sup>H NMR (300 MHz, DMSO-d<sub>6</sub>) δ: 0.95 (d, *J* = 6.6 Hz, 6H), 1.35 (t, *J* = 7.0 Hz, 3H), 2.16-2.22 (m, 1H), 4.40-4.47 (m, 3H), 6.24 (s, 2H), 7.48 (s, 1H), 7.63 (s, 1H), 8.70 (s, 1H), 10.57 (d, *J* = 8.5 Hz, 1H). <sup>13</sup>C NMR (75 MHz, DMSO-d<sub>6</sub>) δ: 14.6, 17.7, 19.4, 30.3, 48.9, 56.8, 96.6, 102.6, 102.7, 110.2, 123.1, 136.0, 146.1, 146.2, 152.6, 164.4, 173.0, 174.2. C<sub>18</sub>H<sub>20</sub>N<sub>2</sub>O<sub>6</sub>·H<sub>2</sub>O, Calculated: C, 57.14; H, 5.86; N, 7.40, Found: C, 57.56; H, 5.69; N, 7.35 .

**(S)-2-(5-Ethyl-8-oxo-dihydro-[1,3]dioxolo[4,5-g]quinoline-7-carboxamido)-3-(*p*-hydroxyphenyl)propanoate (38):**

190 mg, 90%, mp. 292-293°C <sup>1</sup>H NMR (300 MHz, DMSO-d<sub>6</sub>) δ: 1.33 (t, *J* = 7.0 Hz, 3H), 2.91 (dd, *J* = 14.0 & 7.8 Hz, 1H), 3.05 (dd, *J* = 14.0 & 4.8 Hz, 1H), 4.41 (q, *J* = 6.6 Hz, 2H), 4.66 (m, 1H), 6.23 (s, 2H), 6.64 (d, *J* = 8.1 Hz, 2H), 7.00 (d, *J* = 8.1 Hz, 2H), 7.46 (s, 1H), 7.60 (s, 1H), 8.66 (s, 1H), 9.24 (s, 1H), 10.43 (d, *J* = 7.4 Hz, 1H). <sup>13</sup>C NMR (75 MHz, DMSO-d<sub>6</sub>) δ: 14.6, 36.6, 48.9, 53.6, 96.6, 102.8, 110.1, 115.1, 123.1, 127.1, 130.1, 136.0, 146.1, 146.2, 152.5, 156.0, 164.0, 172.9, 174.0. C<sub>22</sub>H<sub>20</sub>N<sub>2</sub>O<sub>7</sub>·1.5H<sub>2</sub>O, Calculated: C, 58.53; H, 5.14; N, 6.21, Found: C, 58.66; H, 4.88; N, 5.91.

**(2*S*,2'*S*)-3,3'-Disulfanediylbis[2-(5-Ethyl-8-oxo-dihydro-[1,3]dioxolo[4,5-g]quinoline-7-carboxamido)propanoate] (39):**

105 mg, 58%, mp. 234-236°C. <sup>1</sup>H NMR (300 MHz, DMSO-d<sub>6</sub>) δ: 1.32 (t, *J* = 6.6 Hz, 6H), 3.18-3.35 (m, 4H), 4.48 (q, *J* = 6.6 Hz, 4H), 4.81-4.85 (m, 2H), 6.21 (s, 4H), 7.40 (s, 2H), 7.53 (s, 2H), 8.65 (s, 2H), 10.64 (d, *J* = 7.7 Hz, 2H). <sup>13</sup>C NMR (75 MHz, DMSO-d<sub>6</sub>) δ: 14.6, 40.3, 48.9, 51.4, 96.5, 102.5, 102.8, 109.9, 123.0, 136.0, 146.2, 152.5, 164.3, 171.9, 173.9. C<sub>32</sub>H<sub>30</sub>N<sub>4</sub>O<sub>12</sub>S<sub>2</sub>·H<sub>2</sub>O, Calculated: C, 51.61; H, 4.33; N, 7.52, Found: C, 51.46; H, 4.32; N, 7.01.

**2-[2-(5-Ethyl-8-oxo-dihydro-[1,3]dioxolo[4,5-g]quinoline-7-carboxamido)acetamido]-3-acetic acid (40):**

170 mg, 90%, mp. 282-284 °C. <sup>1</sup>H NMR (300 MHz, DMSO-d<sub>6</sub>) δ: 1.30 (t, *J* = 7.5 Hz, 3H), 3.68 (d, *J* = 9.0 Hz, 2H), 3.82 (d, *J* = 7.8 Hz, 2H), 4.37 (q, *J* = 7.5 Hz, 2H), 6.18 (s, 2H), 7.40 (s, 1H), 7.54 (s, 1H), 8.63 (s, 1H), 10.55 (d, *J* = 7.6 Hz, 1H). <sup>13</sup>C NMR (75 MHz, DMSO-d<sub>6</sub>) δ: 14.8, 48.9, 54.4, 61.8, 96.6, 102.6, 102.8, 110.4, 123.2, 136.0, 146.1, 146.2, 152.6, 164.2, 172.2, 174.0. C<sub>17</sub>H<sub>17</sub>N<sub>3</sub>O<sub>7</sub>, Calculated: C, 54.40; H, 4.57; N, 11.20, Found: C, 53.95; H, 4.98; N, 11.55.



### General procedure for nalidixic-amino acid conjugates (41-51):

A mixture of 3-(1*H*-Benzo[*d*][1,2,3]triazole-1-carbonyl)-1-ethyl-7-methyl-1,8-naphthyridin-4(1*H*)-one (100 mg, 0.3 mmol), amino acid (0.3 mmol) and triethylamine (61 mg, 0.08 mL, 0.6 mmol) in acetonitrile-water mixture (2.1 mL + 0.9 mL) was stirred at room temperature for three hours. The acetonitrile was removed under vacuum and the residue was acidified with concentrated HCl. The precipitates was filtered and washed with cold water and dried under reduced pressure and recrystallized from aq. ethanol to gave the corresponding product.

#### 2-(1-Ethyl-7-methyl-4-oxo-1,4-dihydro-1,8-naphthyridine-3-carboxamido)acetate (41):

40 mg, 40%, mp. 256-260°C. <sup>1</sup>H NMR (300 MHz, DMSO-*d*<sub>6</sub>) δ: 1.38 (t, *J* = 6.9 Hz, 3H), 2.66 (s, 3H), 4.08 (d, *J* = 5.4 Hz, 2H), 4.55-4.62 (m, 2H), 7.48 (d, *J* = 8.1 Hz, 1H), 8.55 (d, *J* = 8.1 Hz, 1H), 8.97 (s, 1H), 10.07 (s, 1H). <sup>13</sup>C NMR (75 MHz, DMSO-*d*<sub>6</sub>) δ: 15.0, 24.9, 40.9, 46.0, 111.7, 119.6, 121.5, 135.9, 148.0, 148.1, 163.2, 163.9, 171.3, 175.7. C<sub>14</sub>H<sub>15</sub>N<sub>3</sub>O<sub>4</sub>. Calculated: C, 58.13; H, 5.23; N, 14.53, Found: C, 58.44; H, 5.18; N, 14.33.

#### (*S*)-2-(1-Ethyl-7-methyl-4-oxo-1,4-dihydro-1,8-naphthyridine-3-carboxamido)propanoate (42):

81 mg, 90%, mp. 251-253°C. <sup>1</sup>H NMR (300 MHz, DMSO-*d*<sub>6</sub>) δ: 1.35-1.41 (m, 6H), 2.66 (s, 3H), 4.46-4.58 (m, 3H), 7.48 (d, *J* = 8.2 Hz, 1H), 8.54 (d, *J* = 8.1 Hz, 1H), 8.94 (s, 1H), 10.21 (d, *J* = 7.1 Hz, 1H). <sup>13</sup>C NMR (75 MHz, DMSO-*d*<sub>6</sub>) δ: 15.2, 18.4, 25.0, 46.2, 47.7, 111.7, 119.8, 121.7, 136.1, 148.2, 148.3, 163.5, 174.2, 176.0. C<sub>15</sub>H<sub>17</sub>N<sub>3</sub>O<sub>4</sub>·H<sub>2</sub>O. Calculated: C, 56.07; H, 5.96; N, 13.08, Found: C, 56.40; H, 5.99; N, 13.05.

#### 2-(1-Ethyl-7-methyl-4-oxo-1,4-dihydro-1,8-naphthyridine-3-carboxamido)propanoate (43):

87 mg, 96%, mp. 252-254°C. <sup>1</sup>H NMR (300 MHz, DMSO-*d*<sub>6</sub>) δ: 1.35-1.41 (m, 6H), 2.66 (s, 3H), 4.46-4.56 (m, 3H), 7.48 (d, *J* = 8.1 Hz, 1H), 8.54 (d, *J* = 8.1 Hz, 1H), 8.94 (s, 1H), 10.21 (d, *J* = 7.1 Hz, 1H). <sup>13</sup>C NMR (75 MHz, DMSO-*d*<sub>6</sub>) δ: 15.1, 18.3, 25.0, 46.2, 47.7, 111.7, 119.8, 121.7, 136.1,

148.2, 148.3, 163.5, 174.2, 176.0. C<sub>15</sub>H<sub>17</sub>N<sub>3</sub>O<sub>4</sub> Calculated: C, 59.40; H, 5.65; N, 13.85, Found: C, 59.64; H, 5.63; N, 13.66.

**(S)-2-(1-Ethyl-7-methyl-4-oxo-1,4-dihydro-1,8-naphthyridine-3-carboxamido)-3-phenylpropanoate (44):**

250 mg, 55%, mp. 213-215°C. <sup>1</sup>H NMR (300 MHz, DMSO-d<sub>6</sub>) δ: 1.36 (t, *J* = 7.0 Hz, 3H), 2.63 (s, 3H), 3.06 (dd, *J* = 13.5 & 7.5 Hz, 1H), 3.20 (dd, *J* = 13.8 & 5.1 Hz, 1H), 4.52 (q, *J* = 7.0 Hz, 2H), 4.80 (q, *J* = 7.2 Hz, 1H), 7.18-7.30 (m, 5H), 7.42 (d, *J* = 8.1 Hz, 1H), 8.50 (d, *J* = 8.3 Hz, 1H), 8.93 (s, 1H), 10.19 (d, *J* = 7.4 Hz, 1H). <sup>13</sup>C NMR (75 MHz, DMSO-d<sub>6</sub>) δ: 15.0, 24.9, 37.3, 46.0, 53.3, 11.5, 119.6, 121.4, 126.6, 128.3, 129.2, 135.9, 137.0, 148.1, 163.1, 163.5, 172.7, 175.7. C<sub>21</sub>H<sub>21</sub>N<sub>3</sub>O<sub>4</sub>, Calculated: C, 66.48; H, 5.58; N, 11.07, Found: C, 66.21; H, 5.77; N, 11.17.

**(S)-2-(1-Ethyl-7-methyl-4-oxo-1,4-dihydro-1,8-naphthyridine-3-carboxamido)-4-methylsulfanylbutanoate (45):**

70 mg, 64%, mp. 164-165°C. <sup>1</sup>H NMR (300 MHz, DMSO-d<sub>6</sub>) δ: 1.33 (t, *J* = 6.9 Hz, 3H), 1.91-2.15 (m, 6H), 2.51 (m, 1H), 2.60 (s, 3H), 4.49 (q, *J* = 6.9 Hz, 2H), 4.59-4.66 (m, 1H), 7.39 (d, *J* = 8.1 Hz, 1H), 8.45 (d, *J* = 8.1 Hz, 1H), 8.91 (s, 1H), 10.21 (d, *J* = 7.7 Hz, 1H). <sup>13</sup>C NMR (75 MHz, DMSO-d<sub>6</sub>) δ: 14.6, 15.0, 24.8, 29.5, 31.6, 46.0, 50.9, 111.6, 119.6, 121.4, 135.8, 148.0, 163.2, 163.6, 173.1, 175.8. C<sub>17</sub>H<sub>21</sub>N<sub>3</sub>O<sub>4</sub>S, Calculated: C, 56.18; H, 5.82; N, 11.56, Found: C, 55.81; H, 5.82; N, 11.53.

**(S)-2-(1-Ethyl-7-methyl-4-oxo-1,4-dihydro-1,8-naphthyridine-3-carboxamido)-4-methylpentanoate (46):**

70 mg, 67%, mp. 171-172°C. <sup>1</sup>H NMR (300 MHz, DMSO-d<sub>6</sub>) δ: 0.90-0.94 (m, 6H), 1.37 (t, *J* = 6.6 Hz, 3H), 1.65-1.67 (m, 3H), 2.64 (s, 3H), 4.53-4.55 (m, 3H), 7.44 (d, *J* = 8.2 Hz, 1H), 8.50 (d, *J* = 8.1 Hz, 1H), 8.96 (s, 1H), 10.16 (d, *J* = 8.0 Hz, 1H). <sup>13</sup>C NMR (75 MHz, DMSO-d<sub>6</sub>) δ: 15.0, 21.6, 22.8,

24.6, 24.8, 40.3, 46.0, 50.2, 111.6, 119.6, 121.4, 135.8, 148.0, 163.2, 163.5, 173.9, 175.9. C<sub>18</sub>H<sub>23</sub>N<sub>3</sub>O<sub>4</sub>,  
Calculated: C, 62.59; H, 6.71; N, 12.17, Found: C, 62.33; H, 6.73; N, 12.29.

**(S)-2-(1-Ethyl-7-methyl-4-oxo-1,4-dihydro-1,8-naphthyridine-3-carboxamido)-3-methylpentanoate (47):**

80 mg, 77%, mp. 159-160°C. <sup>1</sup>H NMR (300 MHz, DMSO-d<sub>6</sub>) δ: 0.89-0.99 (m, 6H), 1.15-1.31 (m, 1H), 1.39 (t, *J* = 6.6 Hz, 3H), 1.46-1.54 (m, 1H), 1.93 (m, 1H), 2.67 (s, 3H), 4.49-4.66 (m, 3H), 7.49 (d, *J* = 8.1, Hz, 1H), 8.57 (d, *J* = 8.1 Hz, 1H), 8.98 (s, 1H), 10.28 (d, *J* = 8.4 Hz, 1H). <sup>13</sup>C NMR (75 MHz, DMSO-d<sub>6</sub>) δ: 11.5, 15.0, 15.9, 24.7, 24.9, 36.9, 46.0, 56.1, 111.7, 119.7, 121.5, 136.0, 148.1, 163.2, 163.6, 172.9, 176.0. C<sub>18</sub>H<sub>23</sub>N<sub>3</sub>O<sub>4</sub>, Calculated: C, 62.59; H, 6.71; N, 12.17, Found: C, 61.23; H, 6.68; N, 11.83.

**(S)-2-(1-Ethyl-7-methyl-4-oxo-1,4-dihydro-1,8-naphthyridine-3-carboxamido)succinoate (48):**

45 mg, 43%, mp. 238-239°C. <sup>1</sup>H NMR (300 MHz, DMSO-d<sub>6</sub>) δ: 1.38 (t, *J* = 7.2 Hz, 3H), 2.66 (s, 3H), 2.74-2.92 (m, 2H), 4.56 (q *J* = 7.2 Hz, 2H), 4.79-4.86 (m, 1H), 7.47 (d, *J* = 8.1 Hz, 1H), 8.53 (d, *J* = 8.1 Hz, 1H), 8.96 (s, 1H), 10.38 (d, *J* = 8.0 Hz, 1H). <sup>13</sup>C NMR (75 MHz, DMSO-d<sub>6</sub>) δ: 15.0, 24.9, 36.5, 46.0, 48.2, 111.6, 119.7, 121.5, 135.9, 148.2, 163.2, 163.5, 171.9, 172.3, 175.7. C<sub>16</sub>H<sub>17</sub>N<sub>3</sub>O<sub>6</sub>,  
Calculated: C, 55.33; H, 4.93; N, 12.10, Found: C, 55.48; H, 4.90; N, 12.30.

**(S)-2-(1-Ethyl-7-methyl-4-oxo-1,4-dihydro-1,8-naphthyridine-3-carboxamido)-3-methylbutanoate (49):**

60 mg, 60%, mp. 182-185°C. <sup>1</sup>H NMR (300 MHz, DMSO-d<sub>6</sub>) δ: 0.95 (d, *J* = 6.9 Hz, 6H), 1.39 (t, *J* = 7.0 Hz, 3H), 2.17-2.24 (m, 1H), 2.66 (s, 3H), 4.45-4.63 (m, 3H), 7.47 (d, *J* = 8.1 Hz, 1H), 8.55 (d, *J* = 8.1, 1H), 8.97 (s, 1H), 10.28 (d, *J* = 8.4 Hz, 1H). <sup>13</sup>C NMR (75 MHz, DMSO-d<sub>6</sub>) δ: 15.0, 17.6, 19.3, 24.9, 30.3, 46.0, 56.8, 111.7, 119.6, 121.5, 135.9, 148.0, 163.2, 163.8, 172.9, 176.0. C<sub>17</sub>H<sub>21</sub>N<sub>3</sub>O<sub>4</sub>,  
Calculated: C, 62.59; H, 6.71; N, 12.17, Found: C, 62.33; H, 6.73; N, 12.29.

**(S)-2-(1-Ethyl-7-methyl-4-oxo-1,4-dihydro-1,8-naphthyridine-3-carboxamido)-3-(p-hydroxyphenyl)propanoate (50):**

92 mg, 78%, mp. 140-142°C. <sup>1</sup>H NMR (300 MHz, DMSO-d<sub>6</sub>) δ: 1.35 (t, *J* = 6.9 Hz, 3H), 2.62 (s, 3H), 2.91-3.10 (m, 2H), 4.51 (q, *J* = 6.9 Hz, 2H), 4.67-4.74 (m, 1H), 6.65 (d, *J* = 8.0 Hz, 2H), 7.02 (d, *J* = 8.0 Hz, 2H), 7.41 (d, *J* = 8.1 Hz, 1H), 8.48 (d, *J* = 8.1 Hz, 1H), 8.92 (s, 1H), 9.23 (s, 1H), 10.15 (d, *J* = 7.4 Hz, 1H). <sup>13</sup>C NMR (75 MHz, DMSO-d<sub>6</sub>) δ: 15.0, 24.8, 36.6, 46.0, 53.6, 111.6, 115.1, 119.6, 121.4, 127.0, 130.2, 135.9, 148.0, 148.1, 156.1, 163.1, 163.5, 172.8, 175.8. C<sub>21</sub>H<sub>21</sub>N<sub>3</sub>O<sub>5</sub>·H<sub>2</sub>O, Calculated: C, 61.01; H, 5.61; N, 10.16, Found: C, 61.36; H, 5.32; N, 10.55.

**2-[2-(1-Ethyl-7-methyl-4-oxo-1,4-dihydro-1,8-naphthyridine-3-carboxamido)acetamido]acetate (51):**

80 mg, 66%, mp. 246-247°C. <sup>1</sup>H NMR (300 MHz, DMSO-d<sub>6</sub>) δ: 1.38 (t, *J* = 6.9 Hz, 3H), 2.65 (s, 3H), 3.80 (d, *J* = 5.4 Hz, 2H), 4.06 (d, *J* = 5.4 Hz, 2H), 4.56 (q, *J* = 6.9 Hz, 2H), 7.45 (d, *J* = 8.1 Hz, 1H), 8.25 (bs, 1H), 8.53 (d, *J* = 8.1 Hz, 1H), 8.95 (s, 1H), 10.08 (s, 1H). <sup>13</sup>C NMR (75 MHz, DMSO-d<sub>6</sub>) δ: 15.0, 24.8, 42.0, 46.0, 111.9, 119.6, 121.4, 135.9, 147.9, 148.1, 163.1, 163.9, 169.1, 171.2, 175.7. C<sub>16</sub>H<sub>18</sub>N<sub>4</sub>O<sub>5</sub>, Calculated: C, 55.49; H, 5.24; N, 16.18, Found: C, 54.96; H, 5.06; N, 15.91.

**General procedure for cinoxacin-amino acid conjugates (52-54):**

A mixture of 3-(1*H*-benzo[*d*][1,2,3]triazole-1-carbonyl)-1-ethyl-[1,3]dioxolo[4,5-*g*]cinnolin-4(1*H*)-one (100 mg, 0.3 mmol), amino acid (0.3 mmol) and triethylamine (61 mg, 0.08 mL, 0.6 mmol) in acetonitrile-water mixture (2.1 mL + 0.9 mL) was stirred at room temperature for three hours. The acetonitrile was removed under vacuum and the residue was acidified with concentrated HCl. The precipitates was filtered and washed with cold water and dried under reduced pressure and recrystallized from aq. ethanol to give the corresponding product.

**(*S*)-2-(1-Ethyl-4-oxo-1,4-dihydro-[1,3]dioxolo[4,5-*g*]cinnoline-3-carboxamido)propanoate (52):**

93 mg, 82%, mp. 236-238°C. <sup>1</sup>H NMR (300 MHz, DMSO-*d*<sub>6</sub>) δ: 1.38-1.43 (m, 6H), 4.45-4.50 (m, 1H), 4.57-4.64 (m, 2H), 6.31 (s, 2H), 7.54 (s, 1H), 7.65 (s, 1H), 10.45 (d, *J* = 6.9 Hz, 1H). <sup>13</sup>C NMR (75 MHz, DMSO-*d*<sub>6</sub>) δ: 15.2, 18.4, 25.0, 46.3, 47.7, 111.7, 119.8, 121.8, 136.1, 148.2, 148.3, 163.5, 174.2, 176.0. C<sub>15</sub>H<sub>17</sub>N<sub>3</sub>O<sub>7</sub>·H<sub>2</sub>O, Calculated: C, 51.28; H, 4.88; N, 11.96, Found: C, 51.49; H, 4.77; N, 11.92.

**2-(1-Ethyl-4-oxo-1,4-dihydro-[1,3]dioxolo[4,5-*g*]cinnoline-3-carboxamido)-3-phenylpropanoate (53):**

93 mg, 82%, mp. 266-268°C. <sup>1</sup>H NMR (300 MHz, DMSO-*d*<sub>6</sub>) δ: 1.39 (t, *J* = 7.1 Hz, 3H), 3.03-3.10 (m, 1H), 3.20 (dd, *J* = 4.9 & 13.9 Hz, 1H), 4.58 (q, *J* = 7.0 Hz, 2H), 4.73-4.80 (m, 1H), 6.29 (s, 2H), 7.19-7.30 (m, 5H), 7.51 (s, 1H), 7.61 (s, 1H), 10.45 (d, *J* = 7.4 Hz, 1H). <sup>13</sup>C NMR (75 MHz, DMSO-*d*<sub>6</sub>) δ: 13.7, 37.1, 52.7, 53.5, 95.7, 100.8, 103.4, 123.2, 126.6, 128.3, 129.2, 134.8, 137.0, 138.1, 148.1, 153.9, 161.4, 167.7, 172.5. C<sub>21</sub>H<sub>19</sub>N<sub>3</sub>O<sub>6</sub>, Calculated: C, 61.61; H, 4.68; N, 10.26, Found: C, 61.28; H, 4.55; N, 10.21.

**(S)-2-(1-Ethyl-4-oxo-1,4-dihydro-[1,3]dioxolo[4,5-g]cinnoline-3-carboxamido)-3-(1H-indol-3-yl)propanoate (54):**

80 mg, 73%, mp. 179-181°C. <sup>1</sup>H NMR (300 MHz, DMSO-d<sub>6</sub>) δ: 1.39 (t, *J* = 6.9 Hz, 3H), 3.26 (m, 2H), 4.59 (q, *J* = 6.9 Hz, 2H), 4.81 (q, *J* = 6.3 Hz, 1H), 6.30 (s, 2H), 6.94 (t, *J* = 7.4 Hz, 1H), 7.05 (t, *J* = 7.6 Hz, 1H), 7.19 (s, 1H), 7.32 (d, *J* = 8.1 Hz, 1H), 7.50 (bs, 1H), 7.54 (d, *J* = 8.0 Hz, 1H), 7.64 (s, 1H), 10.49 (d, *J* = 7.1 Hz, 1H), 10.90 (s, 1H). <sup>13</sup>C NMR (75 MHz, DMSO-d<sub>6</sub>) δ: 13.7, 52.7, 53.0, 95.7, 100.8, 103.4, 109.2, 111.4, 118.4, 121.0, 123.2, 123.7, 127.3, 135.0, 136.1, 138.1, 148.0, 154.0, 161.4, 167.7, 173.0. C<sub>23</sub>H<sub>22</sub>N<sub>4</sub>O<sub>7</sub>·H<sub>2</sub>O Calculated: C, 59.22; H, 4.75; N, 12.01, Found: C, 59.47; H, 4.71; N, 12.50.

**General procedure for flumequine-amino acid conjugates (55,56):**

A mixture of 2-(1*H*-Benzo[*d*][1,2,3]triazole-1-carbonyl)-9-fluoro-5-methyl-6,7-dihydropyrido[3,2,1-*ij*]quinolin-1(5*H*)-one (100 mg, 0.3 mmol), amino acid (0.3 mmol) and triethylamine (61 mg, 0.08 mL, 0.6 mmol) in acetonitrile-water mixture (2.1 mL + 0.9 mL) was stirred at room temperature for three hours. The acetonitrile was removed under vacuum and the residue was acidified with concentrated HCl. The precipitates was filtered and washed with cold water and dried under reduced pressure and recrystallized from aq. ethanol to give the corresponding product.

**(2S)-2-(9-Fluoro-5-methyl-1-oxo-1,5,6,7-tetrahydropyrido[3,2,1-*ij*]quinoline-2-carboxamido)-3-phenylpropanoate (55):**

65 mg, 53%, mp. 175-176°C. <sup>1</sup>H NMR (300 MHz, DMSO-d<sub>6</sub>) δ: 1.36 (d, *J* = 6.6 Hz, 3H), 2.09 (bs, 2H), 3.00-3.40 (m, 4H), 4.78-4.80 (m, 2H), 7.15-7.30 (m, 5H), 7.60 (dd, *J* = 9.0 & 3.0 Hz, 1H), 7.80 (dd, *J* = 8.7 & 2.7 Hz, 1H), 8.80, (s, 1H), 10.25 (d, *J* = 7 Hz, 1H). <sup>13</sup>C NMR (75 MHz, DMSO-d<sub>6</sub>) δ: 20.0, 21.5, 25.3, 37.3, 53.3, 53.4, 56.5, 108.1, 108.4, 109.8, 120.3, 120.6, 126.6, 128.3, 128.9, 129.2,

131.3, 131.4, 132.4, 137.0, 137.1, 146.3, 157.1, 160.3, 163.8, 163.9, 172.7, 174.6. C<sub>23</sub>H<sub>21</sub>FN<sub>2</sub>O<sub>4</sub>,  
Calculated: C, 67.64; H, 5.18; N, 6.86, Found: C, 67.38; H, 5.18; N, 6.81.

**(2*S*)-2-(9-Fluoro-5-methyl-1-oxo-1,5,6,7-tetrahydropyrido[3,2-*l*-*ij*]quinoline-2-carboxamido)-3-(1*H*-indol-3-yl)propanoic acid (56):**

75 mg, 56%, mp. 202-203°C. <sup>1</sup>H NMR (300 MHz, DMSO-*d*<sub>6</sub>) δ: 1.40 (d, *J* = 6.6 Hz, 3H), 2.14 (bs, 2H), 3.00-3.50 (m, 4H), 4.86 (m, 2H), 6.98 (t, *J* = 7.2 Hz, 1H), 7.08 (t, *J* = 7.2 Hz, 1H), 7.20 (s, 1H), 7.36 (d, *J* = 6.9 Hz, 1H), 7.58-7.66 (m, 2H), 7.81-7.84 (m, 1H), 8.85 (s, 1H), 10.39 (d, *J* = 7 Hz, 1H), 10.93 (s, 1H). <sup>13</sup>C NMR (75 MHz, DMSO-*d*<sub>6</sub>) δ: 20.0, 21.5, 25.3, 27.7, 52.7, 56.5, 108.0, 108.3, 109.3, 110.0, 111.4, 118.4, 120.3, 120.6, 121.0, 123.7, 127.3, 128.8, 128.9, 131.4, 131.5, 132.4, 136.1, 146.3, 157.1, 160.3, 163.9, 173.3, 174.5, 174.6. C<sub>25</sub>H<sub>22</sub>FN<sub>3</sub>O<sub>4</sub>·H<sub>2</sub>O, Calculated: C, 64.51; H, 5.20; N, 9.03, Found: C, 64.44; H, 5.13; N, 8.84.

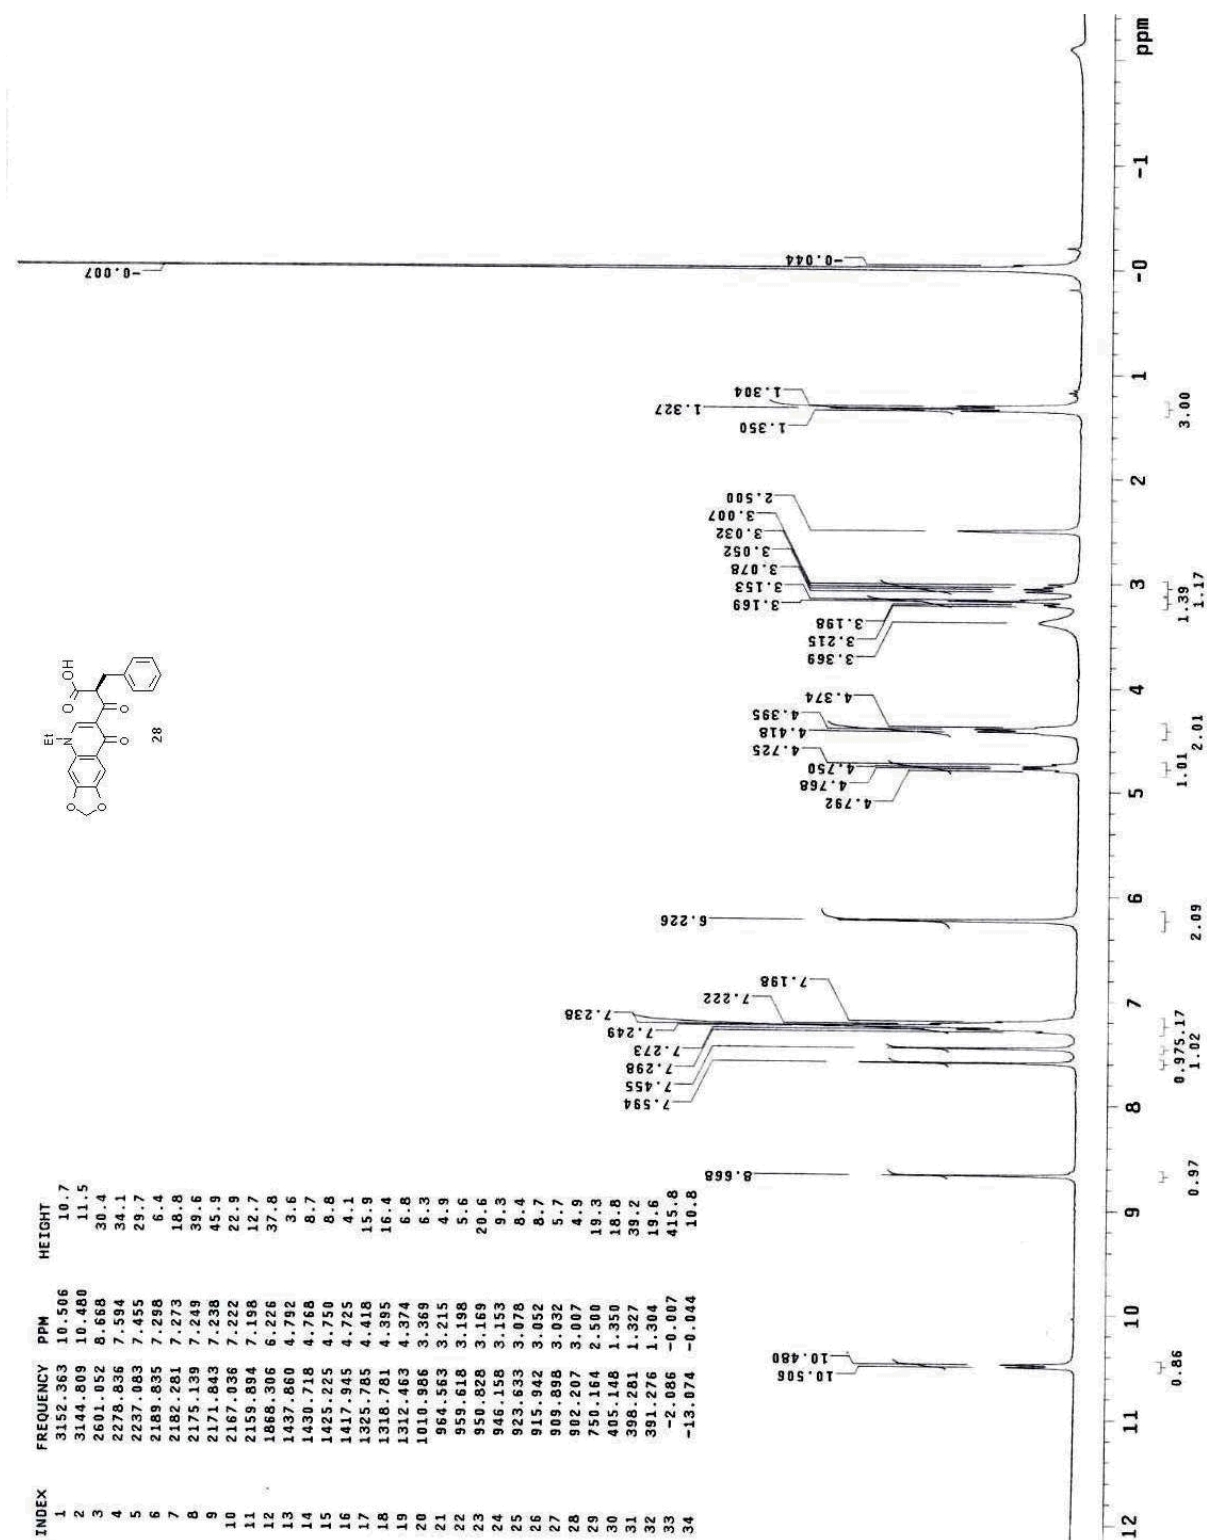





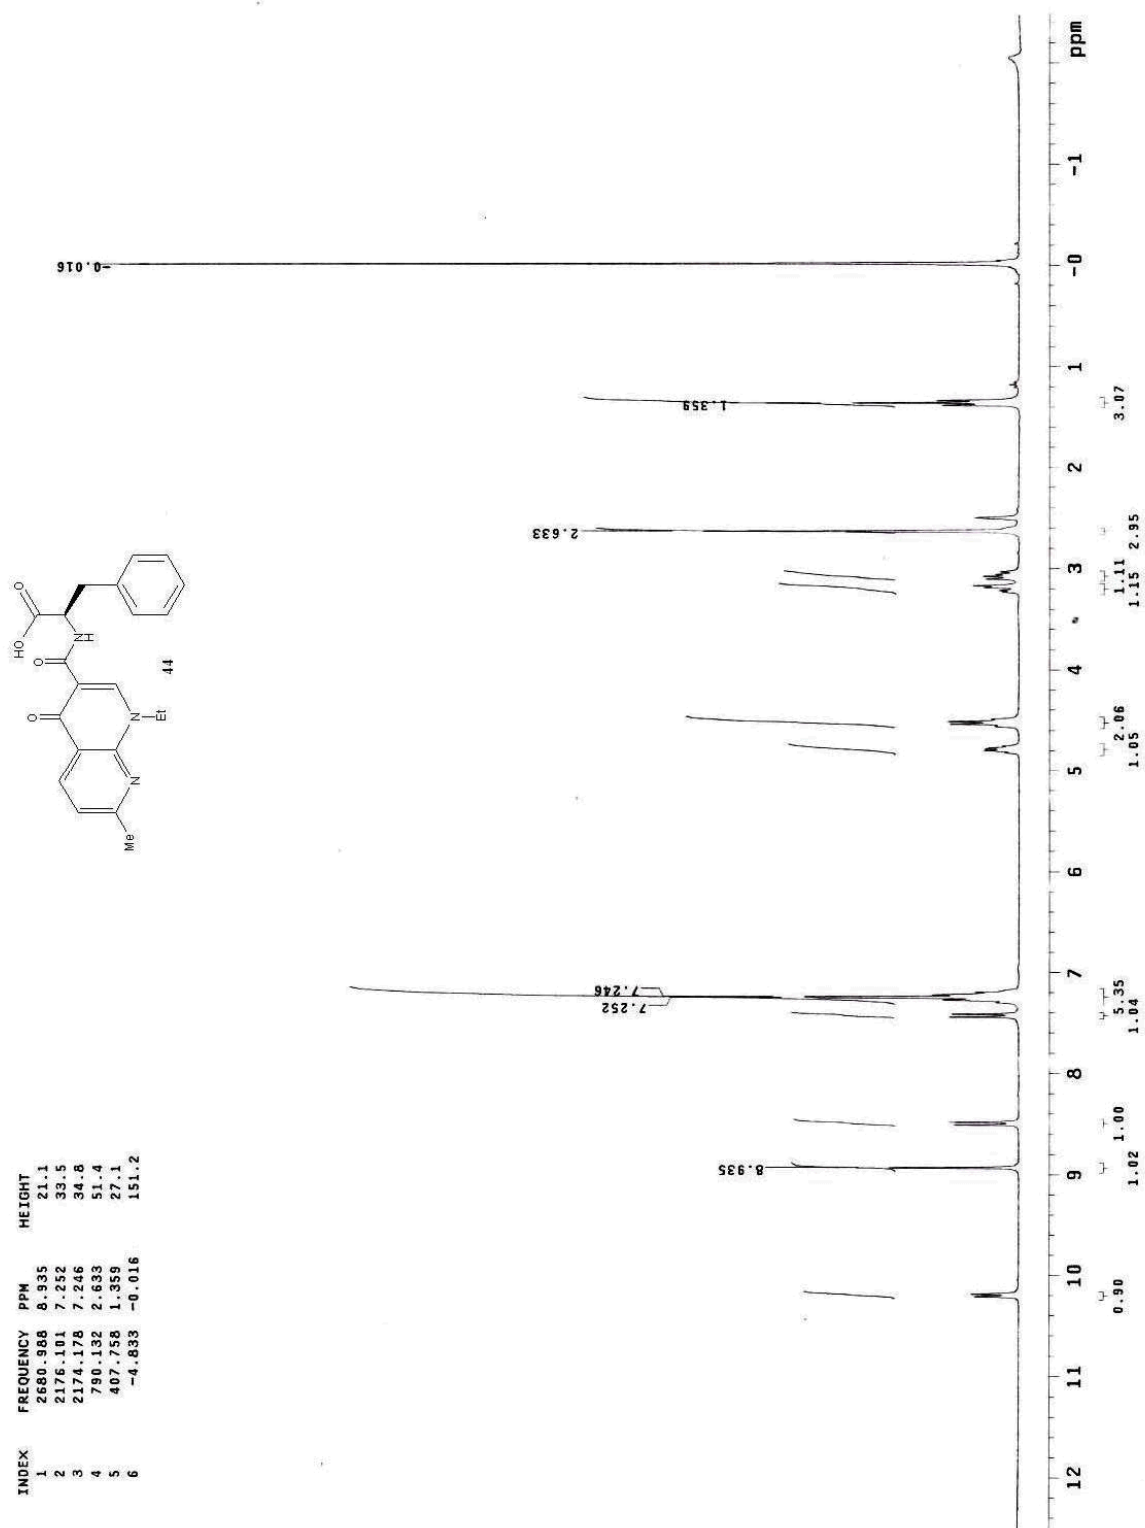

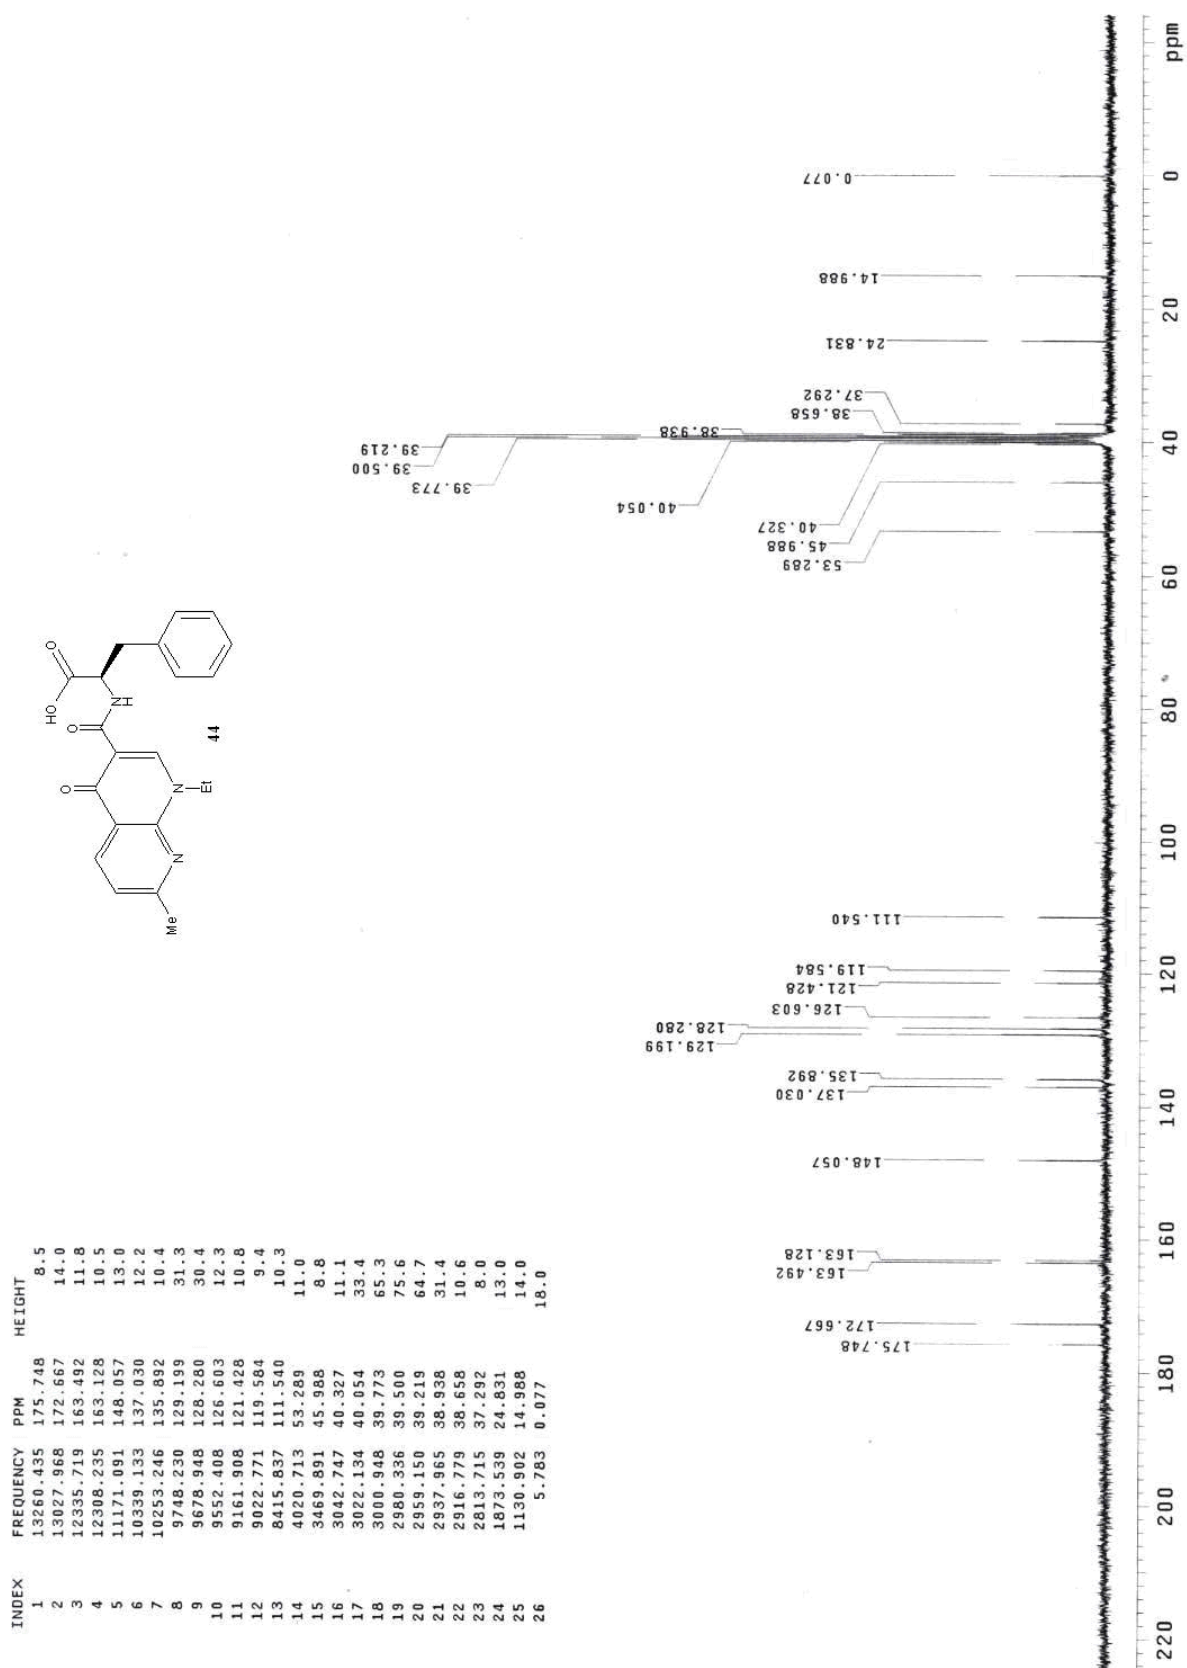

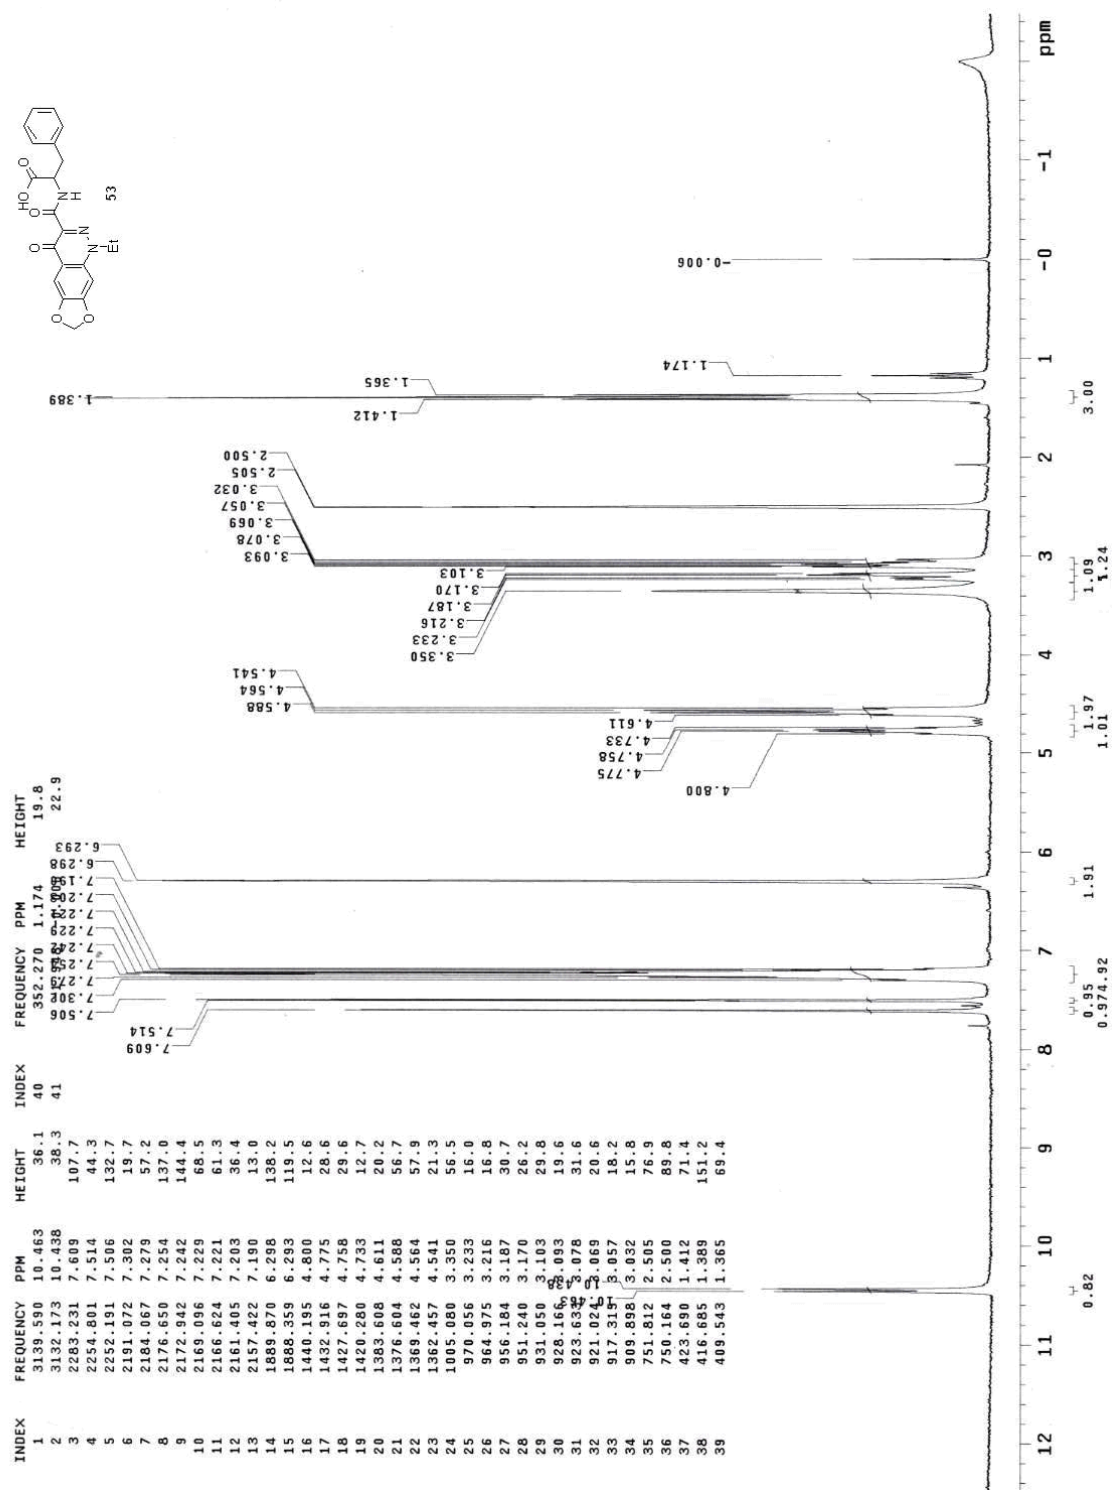

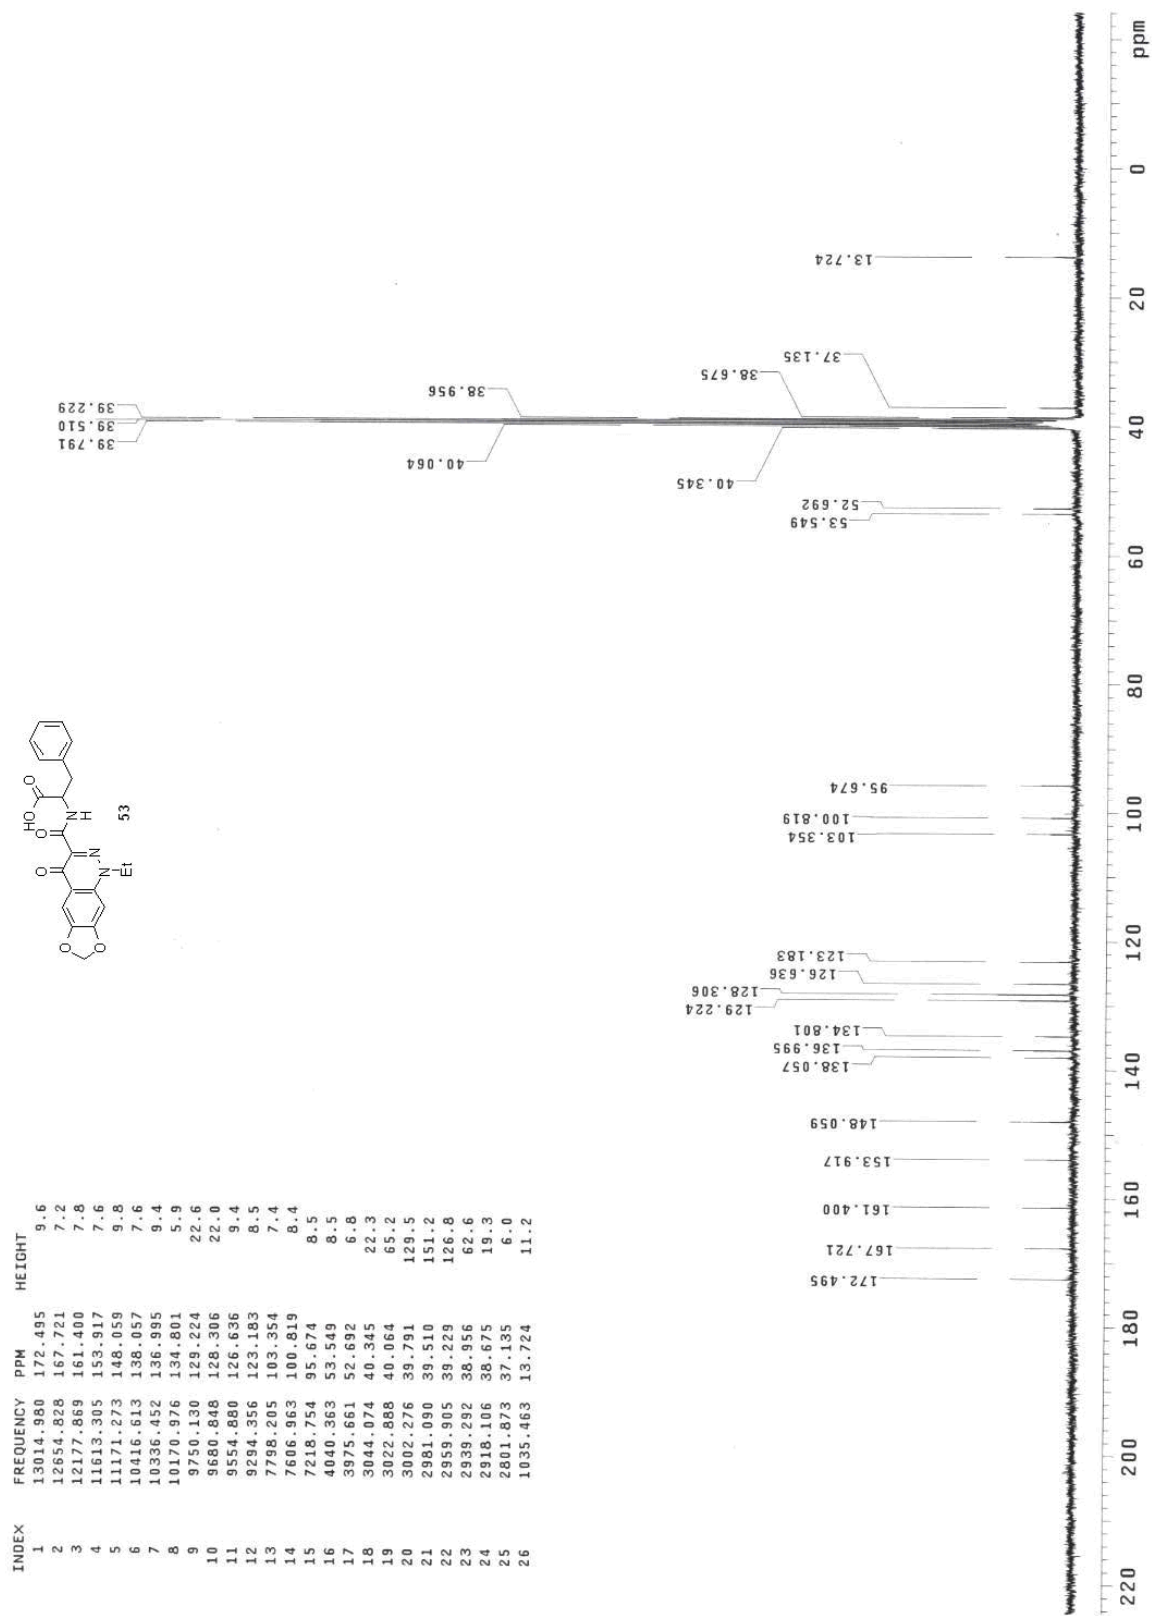

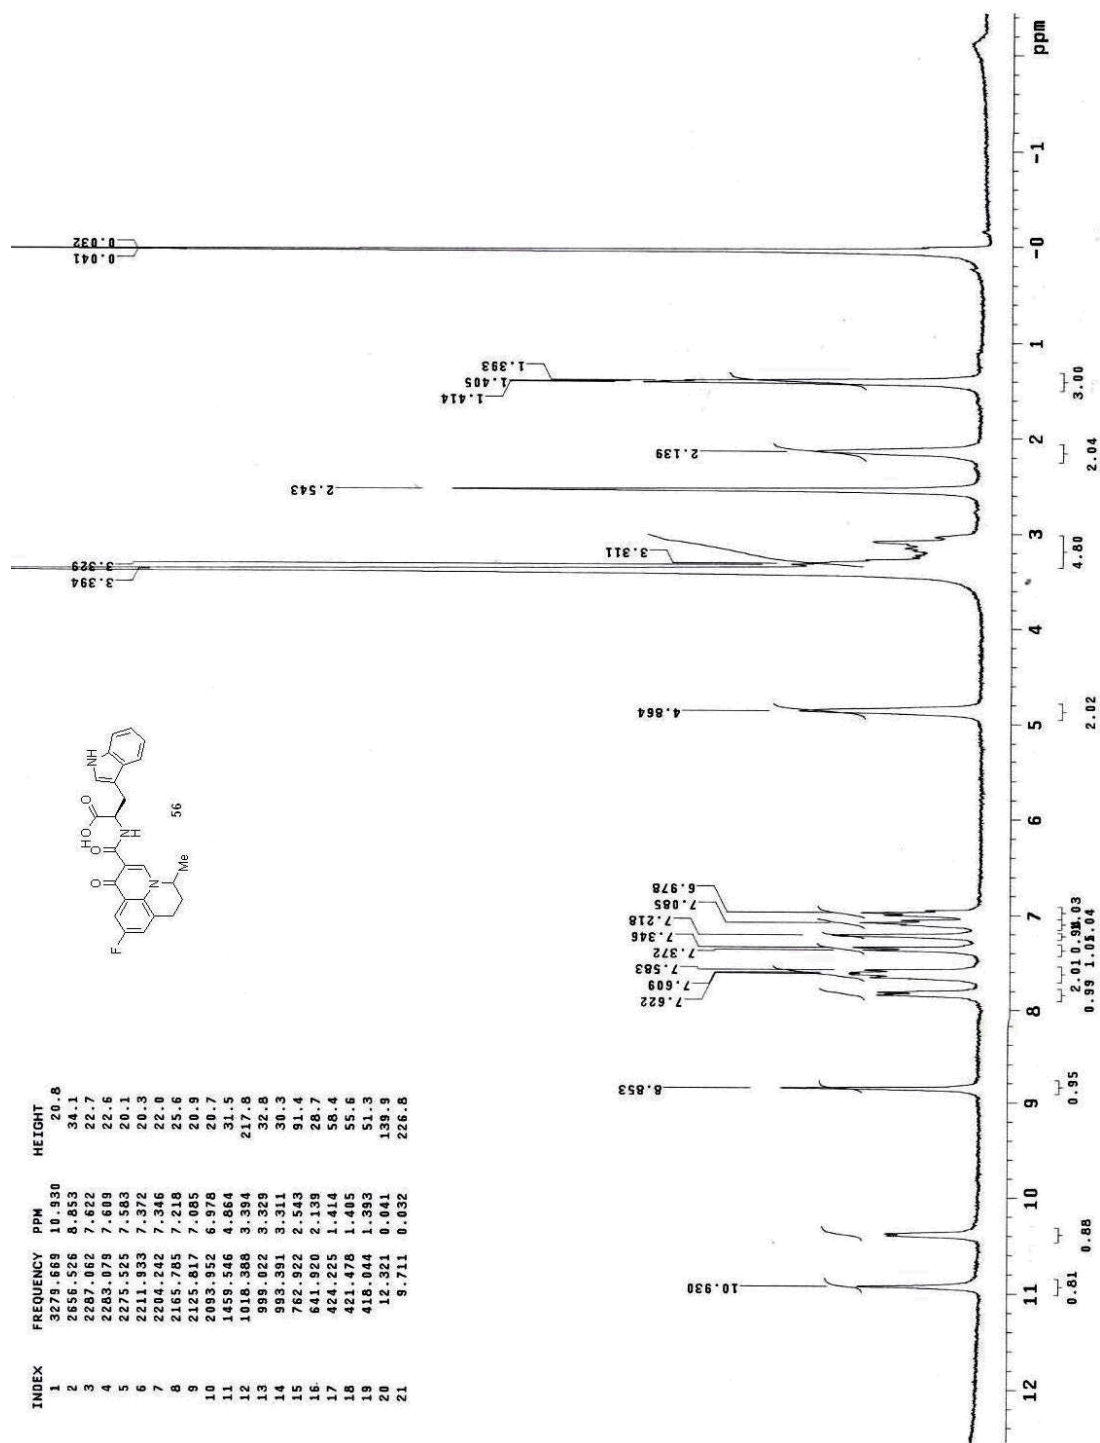

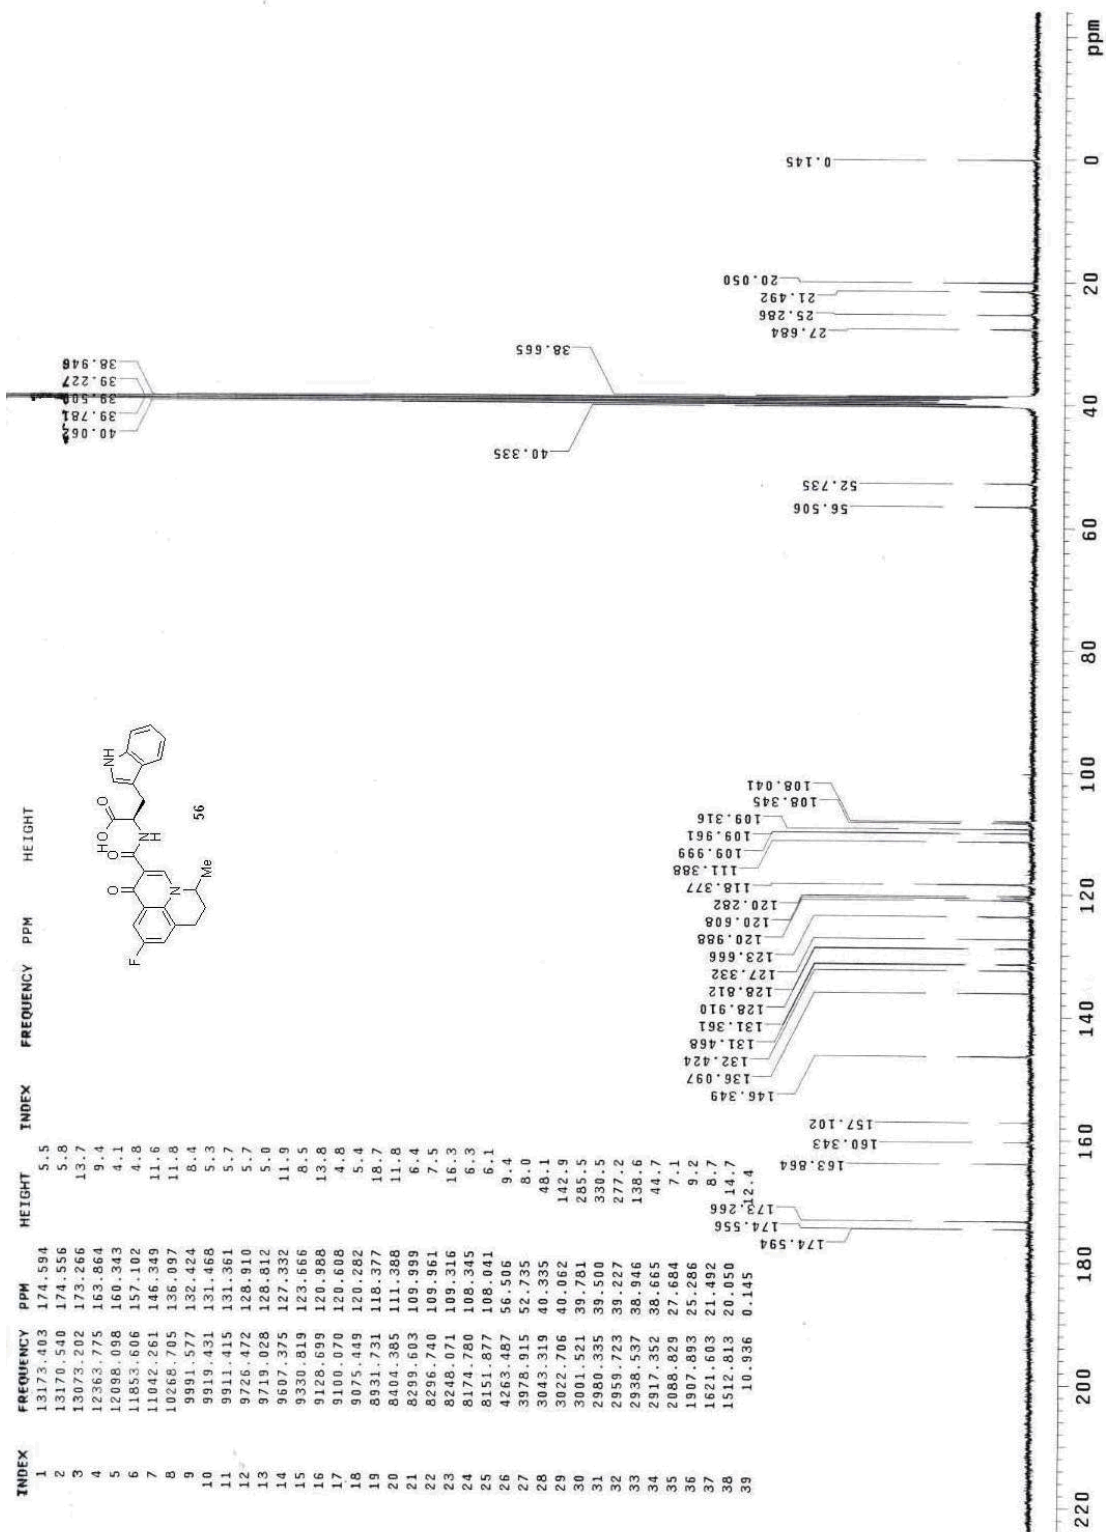

Supplement: b900762h.pdf [file b900762h.pdf]
